# Supplementary material
Source: PubMed Central journal article supplement (PMC4874839)

Supplemental Figure 1, Related to Figure 1

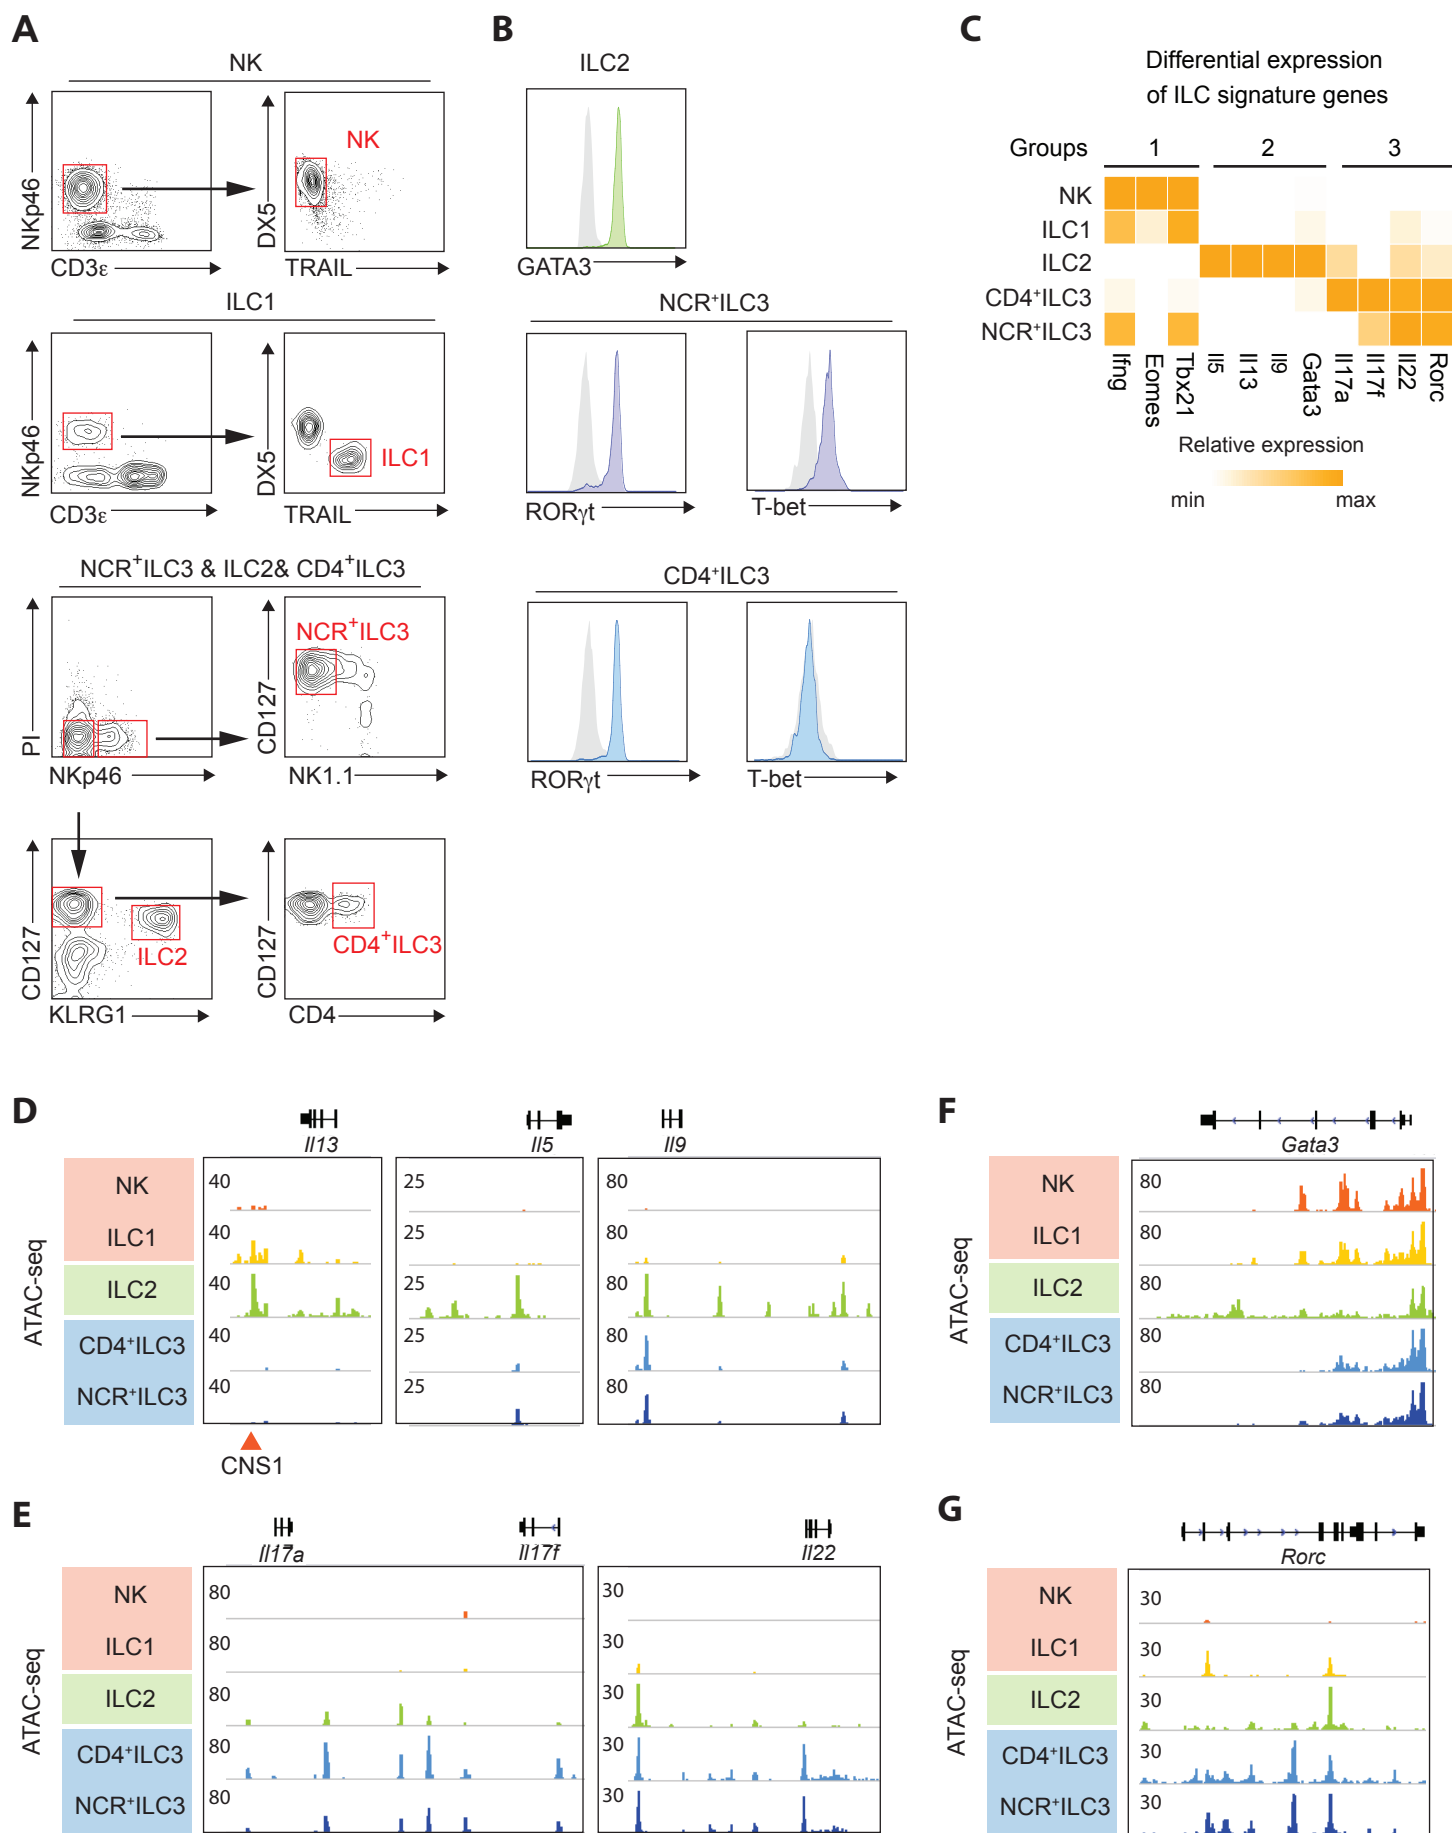

Supplement: NIHMS784350-supplement-1.pdf [file NIHMS784350-supplement-1.pdf]

Supplemental Figure 2, Related to Figure 2

**A**

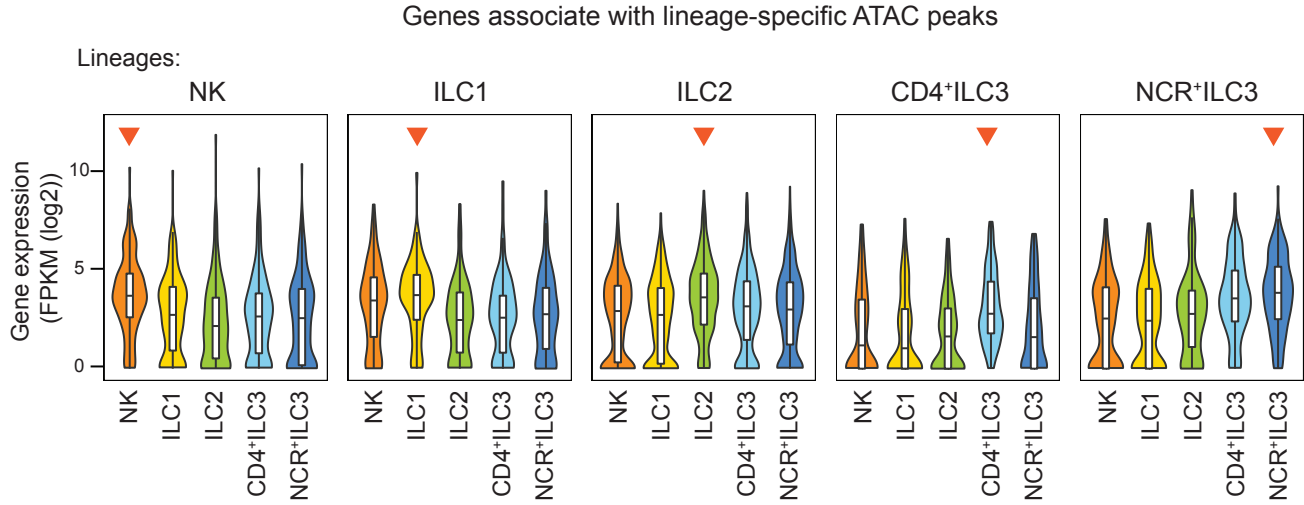

**B**

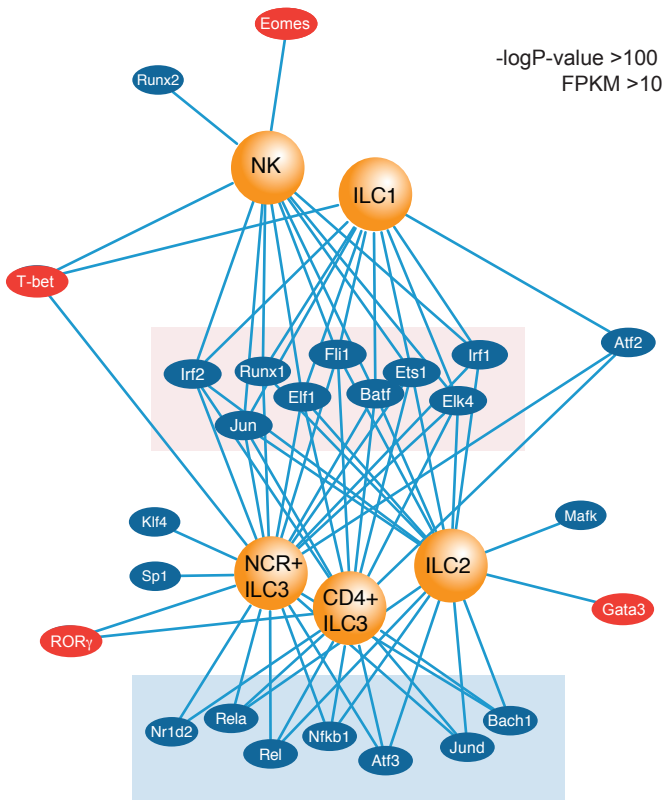

**C**

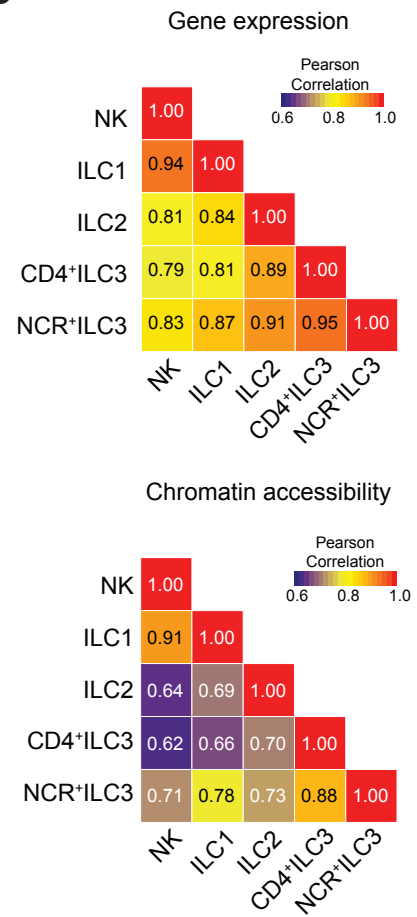

Supplement: NIHMS784350-supplement-2.pdf [file NIHMS784350-supplement-2.pdf]

Supplemental Figure 4, Related to Figure 4

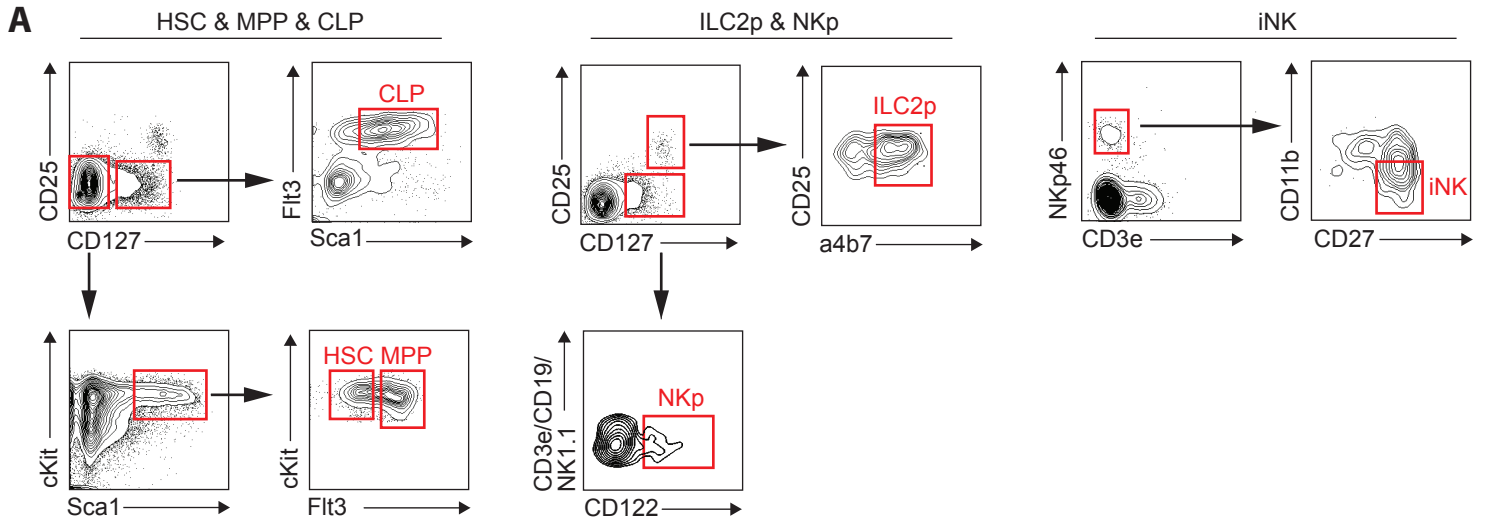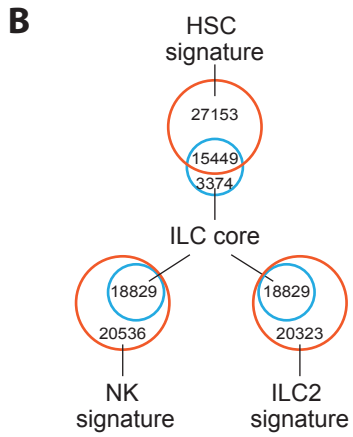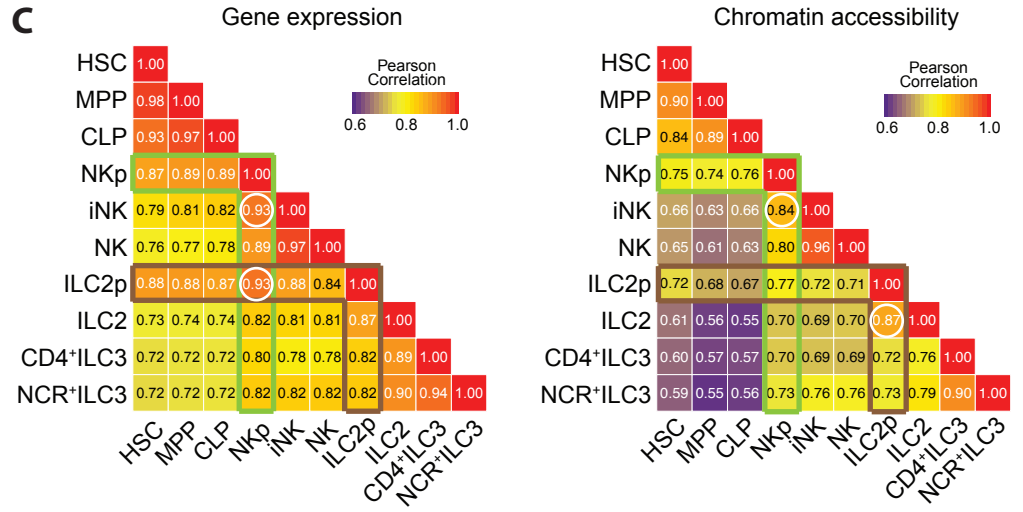

Supplement: NIHMS784350-supplement-4.pdf [file NIHMS784350-supplement-4.pdf]

Supplemental Figure 5, Related to Figure 5

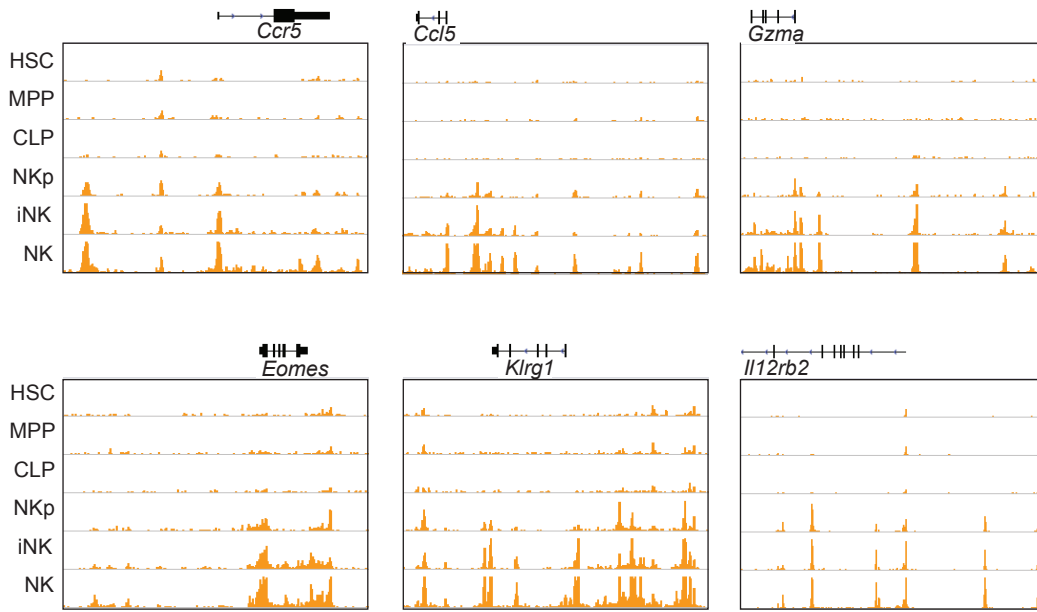

Supplement: NIHMS784350-supplement-5.pdf [file NIHMS784350-supplement-5.pdf]

Supplemental Figure 6, Related to Figure 7

GO Biological Process

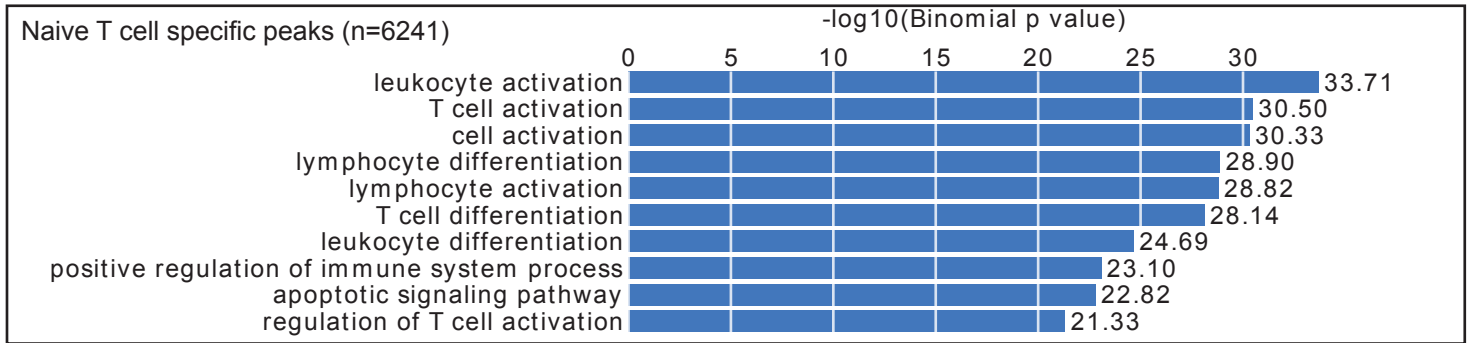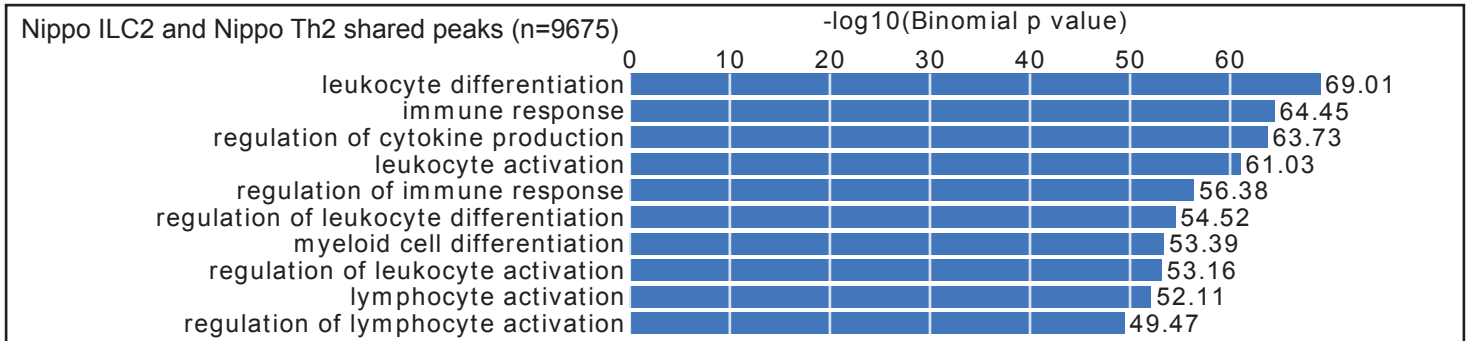

Supplement: NIHMS784350-supplement-6.pdf [file NIHMS784350-supplement-6.pdf]
